# Supplementary material
Source: PubMed Central journal article supplement (PMC4268422)

# Fibrin Composition 1 (C1)

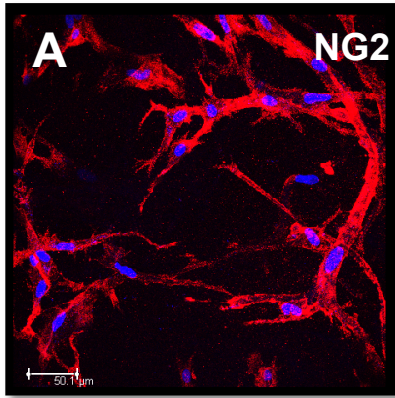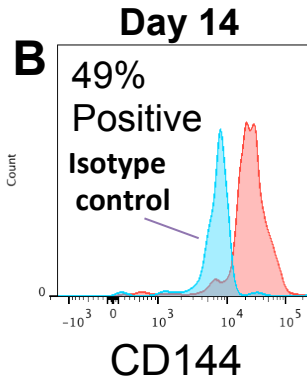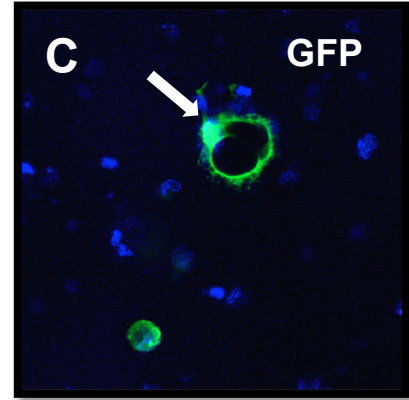

# Fibrin Composition 2 (C2)

# ADSCs on Plastic

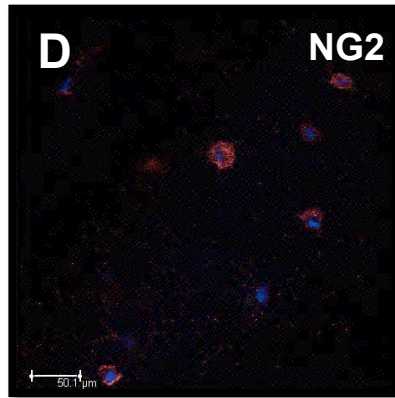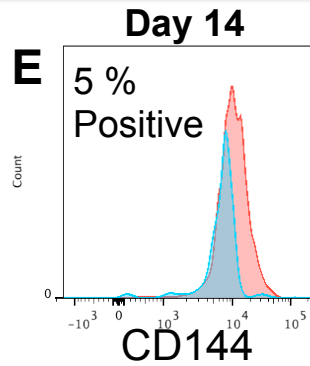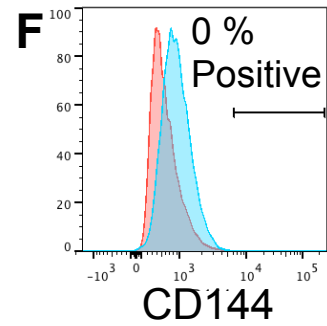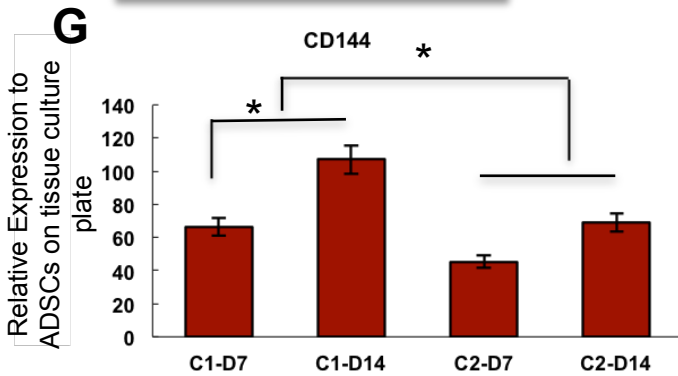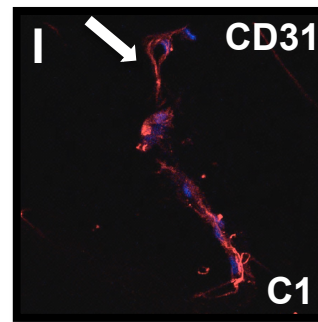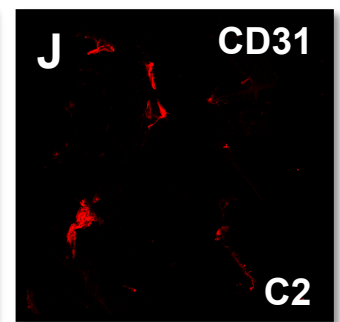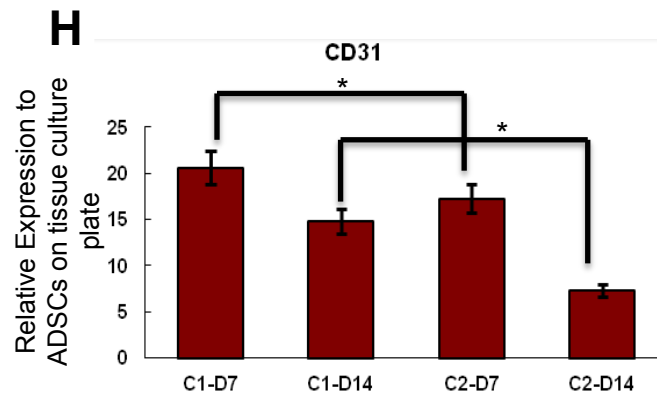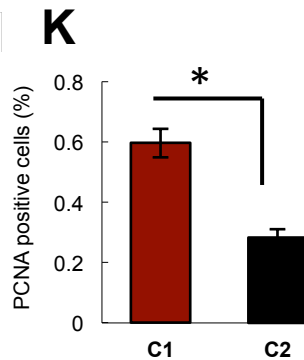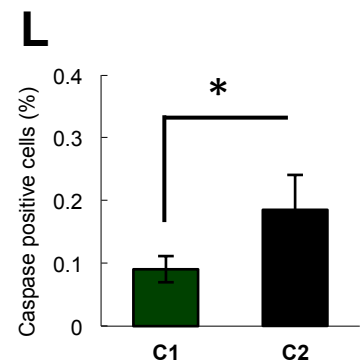

Supplement: NIHMS645716-supplement-1.pdf [file NIHMS645716-supplement-1.pdf]

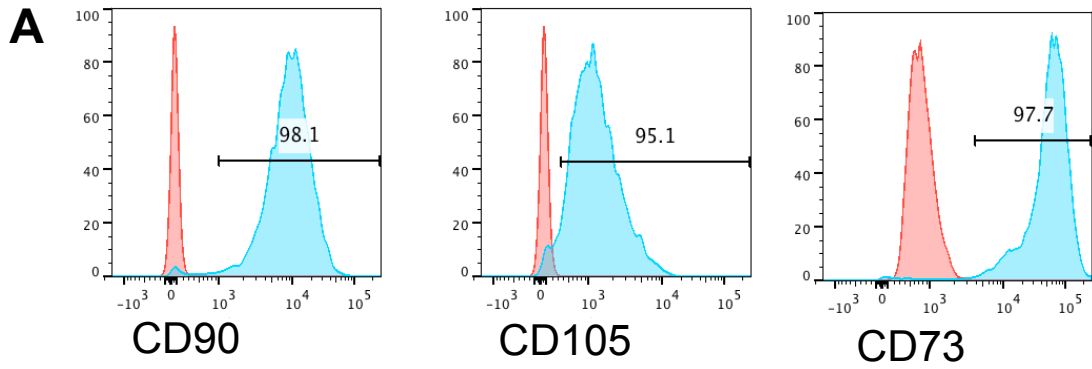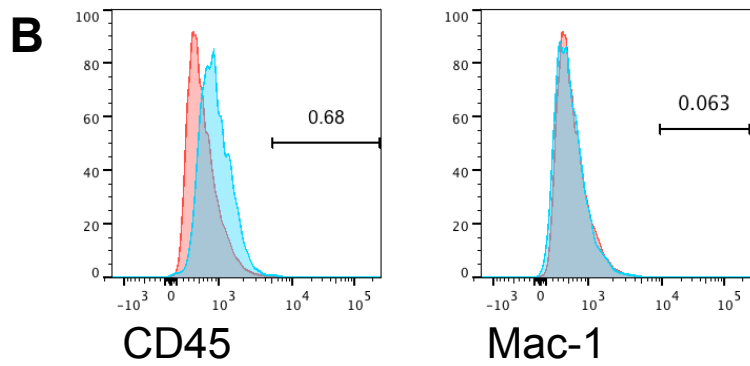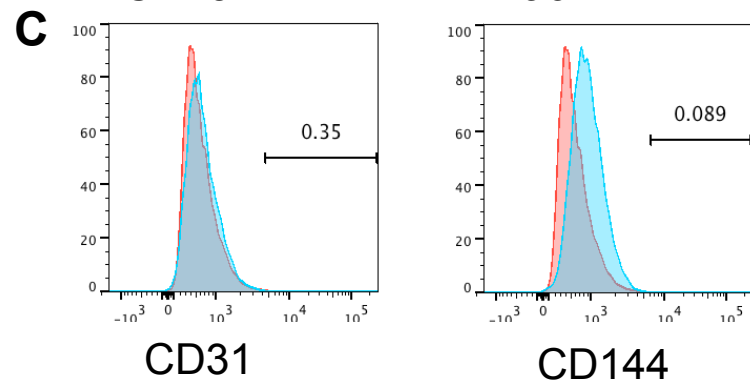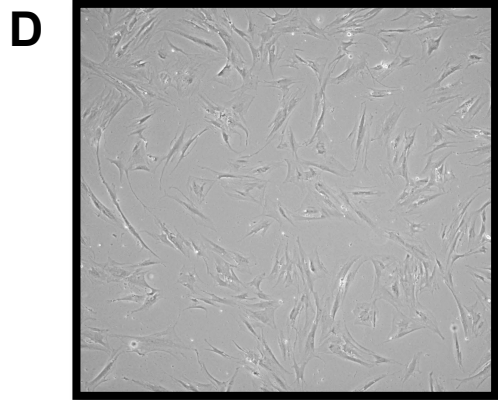

Supplement: NIHMS645716-supplement-2.pdf [file NIHMS645716-supplement-2.pdf]
